# Supplementary material for: Effect of low-temperature plasma treatment of electrospun polycaprolactone fibrous scaffolds on calcium carbonate mineralisation
Source: Royal Society of Chemistry journal article supplement (doi:10.1039/c8ra07386d), 2018-01-01
Supplement: c8ra07386d1.pdf [file c8ra07386d1.pdf]

## **Effect of low temperature plasma treatment of electrospun polycaprolactone scaffolds on calcium carbonate mineralization**

Anna A. Ivanova<sup>1</sup>, Dina S. Syromotina<sup>1</sup>, Svetlana N. Shkarina<sup>1</sup>, Roman Shkarin<sup>2,3</sup>, Angelica Cecilia<sup>4</sup>, Venera Weinhardt<sup>2,4,5</sup>, Tilo Baumbach<sup>2,4</sup>, Mariia S. Saveleva<sup>6</sup>, Dmitry Gorin<sup>6</sup>, Timothy E. L. Douglas<sup>7,8</sup>, Bogdan V. Parakhonskiy<sup>9</sup>, Andre G. Skirtach<sup>9</sup>, Pieter Cools<sup>9</sup>, Nathalie De Geyter<sup>9</sup>, Rino Morent<sup>9</sup>, C. Oehr<sup>10</sup>, Maria A. Surmeneva<sup>1</sup>, Roman A. Surmenev<sup>1\*</sup>

<sup>1</sup>Research School of Chemistry & Applied Biomedical Sciences, National Research Tomsk Polytechnic University, 634050 Tomsk, Russia

<sup>2</sup>Laboratory for Applications of Synchrotron Radiation, Karlsruhe Institute of Technology, Eggenstein-Leopoldshafen, Germany

<sup>3</sup>Institute for Applied Computer Science, Karlsruhe Institute of Technology, Karlsruhe, Germany

<sup>4</sup>Institute for Photon Science and Synchrotron Radiation, Karlsruhe Institute of Technology, Eggenstein-Leopoldshafen, Germany

<sup>5</sup>Centre for Organismal Studies, University of Heidelberg, Heidelberg, Germany

<sup>6</sup>Remote Controlled Theranostic Systems Lab, Educational Research Institute of Nanostructures and Biosystem, Saratov State University, Astrakhanskaya, 83, Saratov, 410026, Russian Federation

<sup>7</sup>UK Engineering Department, Lancaster University, UK

<sup>8</sup>Materials Science Institute (MSI), Lancaster University, UK

<sup>9</sup>Department of Molecular Biotechnology, Faculty of Bioscience Engineering, Ghent University, Coupure Links 653, Ghent 9000, Belgium

<sup>10</sup>Fraunhofer IGB, Stuttgart, Germany

\*Corresponding author: rsurmenev@gmail.com, +7 903 953 09 69 (Tomsk)

## Supplementary data

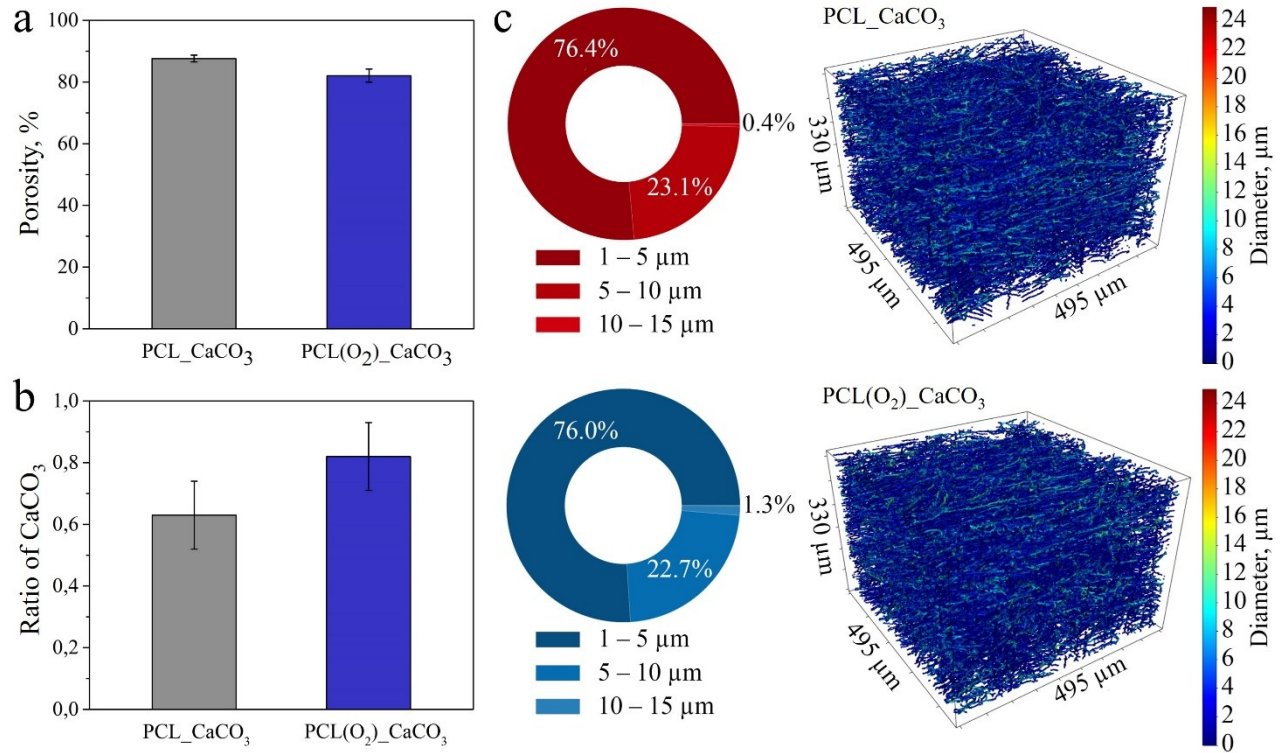

Figure S1. Porosity (a), ratio of CaCO<sub>3</sub> volume to total volume of sample (b), and fibre diameter (c) for untreated and O<sub>2</sub>-plasma-treated PCL/CaCO<sub>3</sub> samples, calculated by X-ray  $\mu$ CT
